1 Broad-scale spatial patterns of canopy cover and pond morphology affect the structure of a  
2 Neotropical amphibian metacommunity

3

4 Diogo B. Provete<sup>1,5</sup>, Thiago Gonçalves-Souza<sup>2</sup>, Michel V. Garey<sup>3,6</sup>, Itamar A. Martins<sup>4</sup>, Denise  
5 de C. Rossa-Feres<sup>3</sup>

6

7 <sup>1</sup> Graduate program in Animal Biology, Institute of Biosciences, Letters and Exact Sciences, São  
8 Paulo State University, São José do Rio Preto, São Paulo, 15054-000, Brazil.

9 <sup>2</sup> Department of Biologia Animal, Institute of Biology, State University of Campinas, Campinas,  
10 São Paulo, 13083-862, Brazil.

11 <sup>3</sup> Department of Zoology and Botany, Institute of Biosciences, Letters and Exact Sciences, São  
12 Paulo State University, São José do Rio Preto, São Paulo, 15054-000, Brazil.

13 <sup>4</sup> Laboratory of Zoology, Department of Biology, Institute of Biological Sciences, University of  
14 Taubaté, Taubaté, São Paulo, 12030-180, Brazil.

15 <sup>5</sup> Current address: Graduate Program in Ecology and Evolution, Department of Ecology, Institute  
16 of Biological Sciences, Federal University of Goiás, Goiânia, Goiás, 74001-970, Brazil.

17 <sup>6</sup> Current address: Universidade Federal da Integração Latino Americana. C. P. 2044, Foz do  
18 Iguaçu, Paraná, 85867-970, Brazil.

19

20

21

22

23

24 **Abstract**

25 Spatial and environmental processes influence species composition at distinct scales. Previous  
26 studies suggested that the landscape-scale distribution of larval anurans is influenced by  
27 environmental gradients related to adult breeding site selection, such as pond canopy cover, but  
28 not water chemistry. However, the combined effects of spatial, pond morphology, and water  
29 chemistry variables on metacommunity structure of larval anurans have not been analyzed. We  
30 used a partial redundancy analysis with variation partitioning to analyze the relative influence of  
31 pond morphology (e.g., depth, area, and aquatic vegetation), water chemistry, and spatial  
32 variables on a tadpole metacommunity from southeastern Brazil. We predict that the  
33 metacommunity will be spatially structured at broad spatial scales, while environmental  
34 variables, mainly related to adult habitat selection, would play a larger role at fine spatial scales.  
35 We found that broad-scale spatial patterns of pond canopy cover and pond morphology strongly  
36 influenced metacommunity structure. Additionally, species composition was spatially  
37 autocorrelated at short distances. We suggest that the reproductive behavior of adult anurans is  
38 driving tadpole metacommunity dynamics, since pond morphology, but not water chemistry  
39 affects breeding site selection by adults. Our results contribute to the understanding of amphibian  
40 species diversity in tropical environments.

41

42 **Keywords** Brazilian Atlantic Rainforest; spatial dynamics; species diversity; habitat selection;  
43 spatial scale.

44

45

46

## 47 **Introduction**

48 A main goal of ecology is to find causal explanations for patterns of distribution and relative  
49 abundance of species (Vellend 2010). Traditionally, environmental gradients have been deemed  
50 as major determinants of species distribution. However, spatial gradients may also influence the  
51 assembly of ecological communities, for example as surrogates for dispersal ability (Beisner et  
52 al., 2006; McIntire & Fajardo, 2009; Landeiro et al., 2011). Accordingly, spatial dynamics have  
53 continuously been incorporated into community ecology through several frameworks (*e.g.*,  
54 Leibold et al., 2004). The primary framework is metacommunity theory, which has advanced our  
55 understanding of how dispersal and patch heterogeneity influence species abundance and  
56 distribution in a set of local communities (Leibold et al., 2004). In addition, the metacommunity  
57 concept represents a multiscale approach to test the joint effects of environmental and spatial  
58 processes on species diversity.

59         Recent studies (Logue et al., 2011; Winegardner et al., 2012) have claimed for an  
60 integrated view of the metacommunity perspectives (Leibold et al., 2004). The assumptions and  
61 predictions of these perspectives differ depending on the amount of dispersal rate and patch  
62 heterogeneity at play in the metacommunity. For instance, the mass effect perspective predicts  
63 that species composition varies with both space and environment, when environment is spatially  
64 structured (Chase et al., 2005). However, species sorting also modulates organismal responses to  
65 environmental heterogeneity (Leibold et al., 2004), especially when organisms track  
66 environmental characteristics related to their fitness, such as breeding site selection (Resetarits et  
67 al., 2005). Nonetheless, data from a number of empirical studies have conformed usually to more  
68 than one perspective (Cottenie, 2005; Logue et al., 2011).

69           Spatial patterns in metacommunities may arise from neutral- and niche-based  
70 mechanisms. Spatial distribution of species under niche-based mechanisms is driven by their  
71 distinct demographic characteristics as a result of differential responses to the environment  
72 (stabilizing mechanisms; Chesson, 2000). According to this view, individuals occupy sites along  
73 environmental gradients in order to maximize their fitness. Conversely, under neutral dynamics  
74 species are ecologically equivalent (equalizing mechanisms) and have the same chance to give  
75 birth, die, migrate, and speciate (equalizing mechanisms; Chesson, 2000), and thus their  
76 abundance is dictated solely by stochastic demographic fluctuations. Consequently, species  
77 distribution would be random, but spatially autocorrelated, due to dispersal limitation of  
78 organisms (equalizing mechanisms; Leibold et al., 2004). Nonetheless, discerning the scale at  
79 which spatial processes influence ecological patterns remains a challenge for ecologists (Levin,  
80 1992; Landeiro et al., 2011).

81           The joint influence of environmental and spatial processes on metacommunity structure  
82 has been largely studied on theoretical grounds (Leibold & McPeck, 2006). As a result, empirical  
83 studies on the effects of environmental and spatial processes on metacommunity structure of  
84 freshwater organisms are scarce, especially in tropical environments (Logue et al., 2011). For  
85 instance, recent experiments with aquatic microorganisms found interacting effects of local  
86 environmental factors and dispersal on species composition and diversity (Cadotte, 2006;  
87 Altermatt et al., 2011). Pond organisms with complex life cycles, such as anuran amphibians, are  
88 a useful model system to test metacommunity theory, since they are subjected to different spatial  
89 and environmental processes at the adult and larval stages. Most amphibians are dispersal-  
90 limited organisms that require wet environments to live and reproduce (reviewed in Smith &  
91 Green, 2005; Wells, 2007). Additionally, several anuran amphibians exhibit a marked philopatric

92 behavior, breeding in the same pond in which they emerged as juveniles (Semlitsch, 2008),  
93 which reinforces the potential effects of both environmental and spatial processes on anuran  
94 metacommunity structure. This complex habitat selection behavior coupled with specific  
95 environmental requirements may act as an endogenous ecological process (McIntire & Fajardo,  
96 2009; Legendre & Legendre, 2012), creating spatial autocorrelation in species composition.  
97 Moreover, adults are the life stage that disperse and effectively connect breeding sites by  
98 oviposition (Wells, 2007; Semlitsch, 2008). As a result, both the spatial arrangement of water  
99 bodies and their surroundings may play a role in the distribution of pond-breeding anurans and  
100 their larvae.

101         The dynamics of the terrestrial ecosystem surrounding ponds strongly also affects  
102 freshwater metacommunities. One aspect of the terrestrial ecosystem that strongly influences the  
103 aquatic ecosystem is pond canopy cover, which is a key gradient affecting the distribution of  
104 several freshwater organisms, from odonate larvae (McCauley et al., 2008), to tadpoles (Skelly et  
105 al., 1999; Werner et al., 2007), to snails (Hovermann et al., 2011). Canopy cover alters light  
106 availability and leaf litter input into ponds, and consequently primary productivity and  
107 decomposition (Werner et al., 2007). As a result, larval fitness is lower in less productive,  
108 closed-canopy ponds (Schiesari, 2006). Besides primary productivity, canopy cover may affect  
109 other water chemistry variables that influence larval development, such as temperature,  
110 conductivity, and dissolved oxygen (Werner & Glennenmeier, 1992). Consequently, few species  
111 tolerate and colonize closed-canopy ponds, but those that do benefit from lower exploitative  
112 competition (Schiesari, 2006).

113         On the other hand, the influence of water chemistry on freshwater communities has been  
114 rarely investigated at the metacommunity scale (*e.g.*, Hecnar & M'Closkey, 1996; Hajek et al.,

115 2011). Several water chemistry variables modulate tadpole survival, development, and time to  
116 metamorphosis. Conductivity is often correlated with dissolved ions and solids, mineral particles,  
117 disturbance or eutrophication that affect osmoregulation and larval development (Welch &  
118 MacMahon, 2005). Low pH disrupts the Ca:Na ratio, directly influencing survival. Temperature  
119 and dissolved oxygen affect metabolic rates and directly influence time to metamorphosis and  
120 larval fitness (reviewed in Ultsch et al., 1999). Turbidity is related to the trophic status of ponds  
121 (Scheffer et al., 1993). Hence, water chemistry may represent the influence of local environment  
122 on tadpole relative abundance, as expected under the species sorting perspective.

123       Taken together, the aforementioned environmental variables seem to differentially affect  
124 adult anurans and their larvae. On the one hand, the distribution of adult anurans seems to be  
125 more influenced by spatial processes and landscape attributes of the terrestrial ecosystem  
126 (Resetarits et al., 2005; Binckley & Resetarits, 2007; Wells 2007). On the other hand, larval  
127 development, growth, and abundance might be directly influenced by local water chemistry  
128 (Ultsch et al., 1999), although any metacommunity-scale process on adults will probably affect  
129 their larvae. However, to the best of our knowledge, empirical studies have not tested the  
130 combined effects of spatial structure, water chemistry, and pond morphology on amphibian  
131 species composition, especially in diverse, tropical environments (see also Logue et al., 2011). In  
132 particular, the complex life cycle characteristic of amphibians has the potential to simultaneously  
133 test whether different perspectives in metacommunity theory could explain community  
134 assembly.

135       Therefore, we hypothesized that these two sets of environmental variables represent  
136 alternative mechanisms driving metacommunity dynamics. Following McIntire & Fajardo  
137 (2009), we argued that pond morphology and canopy cover could be proxies for the effect of

138 adult breeding site selection at the metacommunity scale, while water chemistry represented the  
139 local effects of pond environment, by influencing tadpole development and survival. In this  
140 framework, closed-canopy ponds are harsh environments, acting as a sink, whereas open-canopy  
141 ponds are more favorable, source environments. Therefore, we hypothesize that a mass effect  
142 may be involved in maintaining populations in closed-canopy ponds, which disperse from open-  
143 canopy. Concurrently, species sorting may also play a role in amphibian metacommunities, given  
144 the low dispersal ability of adults, and their tendency to track environmental characteristics  
145 related to breeding sites. As a result, we expect that pond morphology and canopy cover  
146 influence species composition at broad scales, while water chemistry would be more significant  
147 at fine spatial scales.

148

## 149 **Material and methods**

150

### 151 **Study area and sampling**

152 This study was carried out in the Serra da Bocaina National Park (22° 40' to 23° 20' S; 44° 24' to  
153 44° 54' W), at the border between the states of São Paulo and Rio de Janeiro, southeastern Brazil  
154 (Fig. 1). Our samples were collected on the Bocaina highlands (1,500 m a.s.l.), in São José do  
155 Barreiro, São Paulo, and extended over an area of approximately 11 Km<sup>2</sup> (ponds were 2.15 Km  
156 apart in mean, maximum 6 Km). The climate in this region is of the type Cwb (humid  
157 subtropical highland) according to the Köppen-Geiger classification (Peel et al., 2007), with  
158 moderated temperatures, dry winters (between April and September) and warm summers (from  
159 October to March). The annual rainfall varies between 400 and 2100 mm, with mean annual  
160 temperature of 22° C. The breeding season for the majority of adult anurans is during the rainy

161 season (M.V. Garey, unpub. data). Thus, we sampled ponds in this period in order to maximize  
162 the chance of collecting most of species.

163 We sampled tadpoles using a hand dipnet in 13 water bodies with different morphologies  
164 (e.g., area, depth, and aquatic vegetation) and varying degrees of canopy cover, monthly between  
165 August 2008 and January 2009. All ponds were sampled within a one-week period each month.  
166 All ponds were fishless, and 3 out of 13 held water during only three months, all others were  
167 permanent ponds. Blind sweeps were made along the entire margins of water bodies, with effort  
168 proportional to surface area (Skelly & Richardson, 2010). Tadpoles were fixed in the field with  
169 10% formalin. In addition, adult anurans were acoustically monitored monthly to record the  
170 species present in each water body, which would help in tadpole identification.

171 Prior to tadpole sampling, we recorded two sets of pond characteristics: (i) water  
172 chemistry variables, namely: conductivity (mS/cm), dissolved oxygen (mg/l), pH, temperature  
173 (°C), and turbidity (NTU) using a Horiba U-10 multiparameter water quality checker; (ii) pond  
174 morphology variables: surface area (m<sup>2</sup>), maximum depth (m), and aquatic vegetation (%). We  
175 estimated aquatic vegetation visually by dividing pond surface into quadrants; the percentage of  
176 aquatic vegetation was used as a proxy for habitat structural complexity, varying from 0 (low  
177 complexity) to 100% (high complexity). We also recorded pond canopy cover (%) using a  
178 spherical densitometer (Forestry Suppliers, Jackson, MS, U.S.A.); measurements were taken in  
179 four directions (N, S, E, W), and the center of the pond. Pond morphology variables were  
180 measured only once at the peak of the rainy season, whereas water chemistry was measured  
181 during all sampling period. Prior to analyses, we standardized environmental variables to zero  
182 mean and unit variance to account for their different scales of measurement. Calculations were  
183 implemented in *vegan* package (Oksanen et al., 2011) in R version 2.13.2 (R Core Team, 2011).



184  
185 Spatial variables  
186 We used distance-based Moran's Eigenvector Maps (dbMEM; Dray et al., 2012; Legendre &  
187 Legendre, 2012) to describe spatial structures. We computed dbMEM eigenvectors from a  
188 truncated geodesic distance matrix obtained with R package *fields* (Furrer et al., 2011). The  
189 longest distance (2.887 Km) connecting two ponds in a minimum spanning tree of sampling sites  
190 (Fig. S1) was used as a threshold to truncate the distance matrix. This procedure produced 7  
191 dbMEMs. Analysis was conducted using R package *PCNM* (Legendre et al., 2010). By  
192 concentrating most of the variation, the first eigenvectors usually describe broad spatial  
193 structures, while last eigenvectors describe fine spatial structures (Dray et al., 2012; Legendre &  
194 Legendre, 2012). Further, we implemented a forward selection procedure with double-stopping  
195 criteria (Legendre & Legendre, 2012) in R package *packfor* (Dray, 2009) to only select dbMEMs  
196 that significantly explained the variance in the species composition matrix. This procedure  
197 recovered 5 dbMEM (accumulated  $R^2_{\text{adj}} = 0.414$ ; Fig. S2-S3). dbMEM 1 and 2 were arbitrarily  
198 classified as broad-scale variables, dbMEM 4 as medium scale, and dbMEM 5 and 7 as fine-  
199 scale variables (Fig. S2). The first two dbMEMs modeled positive spatial autocorrelation  
200 (Moran's  $I = 0.291$  and  $0.084$ , respectively), while the last three modeled negative  
201 autocorrelation (Moran's  $I = -0.218$ ,  $-0.068$ , and  $-0.033$ , respectively). All eigenvectors were  
202 used as spatial variables in the following analysis, since excluding those with negative Moran's  $I$   
203 seems not to change overall results (see Legendre & Legendre, 2012).

204

205

206

207 Data analyses

208 For all subsequent analyses, we transformed the total counts of species using the Hellinger  
209 transformation (Legendre & Legendre, 2012) to homogenize variation among species  
210 abundances. None environmental variable had a Variation Inflation Factor higher than 3. Thus,  
211 all were included in the further analysis. We employed a variation partitioning approach to  
212 disentangle species response to environmental (pond morphology, canopy cover, and water  
213 chemistry) and spatial variables (dbMEMs) driving metacommunity structure (Cottenie, 2005;  
214 Legendre & Legendre, 2012). Despite some recent criticism (Gilbert & Bennett, 2010; Smith &  
215 Lundholm, 2010; but see Diniz-Filho et al., 2012), this analytical technique remains useful to  
216 separate variation in species composition generated by environmental gradients, spatial  
217 autocorrelation, and spatially structured environmental gradients (shared variance). We  
218 determined the pure and shared effects of water chemistry, pond morphology, and pond spatial  
219 network (dbMEM) on species composition using a partial Redundancy Analysis (pRDA;  
220 Legendre & Legendre, 2012), with adjusted canonical  $R^2$  values (Legendre & Legendre, 2012).  
221 Since we sampled ponds repeatedly, we used each pond and month as factors in the pRDA and  
222 then performed a randomization stratified within ponds (Lepš & Šmilauer, 2003), with 999  
223 Monte Carlo randomizations to determine significance. We also built a Mantel correlogram to  
224 investigate the spatial pattern of species composition and also correlograms to analyze the spatial  
225 patterns of environmental variables. Analyses were implemented in R packages *vegan* (Oksanen  
226 et al., 2011) and *spdep* (Bivand, 2012). To identify the environmental variables related to each  
227 spatial model, we regressed each dbMEMs (explanatory variables) against pond morphology and  
228 water chemistry (predictor variables; Borcard et al., 2004). Linearity was checked visually.  
229

## 230 **Results**

231

232 We recorded tadpoles of 15 amphibian species belonging to 5 families. The most abundant  
233 species were *Rhinella icterica* (3,532 individuals), *Hypsiboas* sp. (aff. *polytaenius*) with 2,339  
234 individuals, and *Scinax* sp. (aff. *hayii*) with 2,318 individuals. The mean species richness per  
235 pond was 2.8 ( $\pm$  1.45 SD; range = 2 - 9). *Chiasmocleis mantiqueira* and *Scinax* sp. (aff.  
236 *obtriangulatus*) were represented by only two individuals and were not included in further  
237 analysis, since they could affect pRDA.

238 Both environmental variables and spatial distribution of ponds affected metacommunity  
239 structure. Pond morphology and canopy cover accounted for 16 % ( $P = 0.005$ ), whereas water  
240 chemistry did not explain a significant proportion of the variation in species composition ( $R^2_{\text{adj}} =$   
241 0.00;  $P = 0.75$ ; Fig. 2). Pond canopy cover and aquatic vegetation were the two variables that  
242 mainly influenced species composition (Table 1; Fig. 3). The pure spatial component explained  
243 about 20 % ( $P = 0.005$ ) of the variation in species composition. Residual variation represented  
244 40 %. Furthermore, it is noteworthy that all variation (16 %) in pond morphology and canopy  
245 cover were spatially structured (Fig. 2).

246 Species composition showed significant positive spatial autocorrelation in the first two  
247 distance classes (between 0.01 and 1.63 Km) and negative autocorrelation in the third and fourth  
248 distance classes (between 2.43 and 3.24 Km; Fig. S4). Ponds separated by 2.43 Km (upper limit  
249 of the third distance class) differ in composition, probably due to contrasting values of canopy  
250 cover, area, depth, and aquatic vegetation at short distances (Fig. S5). Water depth was the most  
251 important variable, explaining all spatial variables. Other variables were related to one or two  
252 broad-scale dbMEMs. Temperature, pH, and turbidity were not significantly related to any

253 spatial variable (Table 2). Thus, the strong induced spatial dependence of pond morphology and  
254 canopy cover ( $R^2_{\text{adj}}=0.16$ ; Fig. 2), but not water chemistry ( $R^2_{\text{adj}}=0.04$ ; Fig. 2) are directly  
255 influencing the spatial dynamics of amphibian species. Taken together, these results suggest that  
256 species sorting and mass effects related to adult breeding site selection are shaping  
257 metacommunity structure.

258

## 259 **Discussion**

260

261 We found that both the pure spatial and environmental component related to pond morphology  
262 and canopy cover accounted for large and significant fractions of the variation in species  
263 composition. More importantly, the gradients of pond canopy cover and morphology were  
264 spatially structured. These results point to a combination of different metacommunity processes,  
265 in which both mass effects and species sorting are playing key roles in metacommunity  
266 dynamics. Additionally, the induced spatial dependence of variables from the surrounding  
267 terrestrial ecosystem (i.e., pond morphology and canopy cover), which we hypothesized to  
268 represent the effects of adult breeding site selection, suggest that spatial dynamics of anuran  
269 larvae is essentially determined by behavioral decisions of adults in response to spatially  
270 structured environmental gradients.

271 All of the variation in species composition accounted for by pond morphology and  
272 canopy cover was spatially structured. We hypothesized that canopy cover and other pond  
273 morphology variables represented the effects of the surrounding terrestrial landscape on adult  
274 habitat selection (Resetarits et al., 2005; Binckley & Resetarits, 2007). In this sense, tadpole  
275 metacommunity structure seems to be essentially determined by environmental characteristics

276 that vary at the metacommunity scale (i.e., pond morphology), in contrast to local, pond water  
277 chemistry variables. Furthermore, we also showed that the pure spatial processes (~ 20%) seem  
278 to play a larger role in shaping species composition, compared to pond morphology variables  
279 alone (16%). The high variation accounted for by the pure spatial component can be attributed  
280 either to unmeasured environmental variables or pure spatial processes, such as dispersal  
281 limitation (Landeiro et al., 2011; Legendre and Legendre, 2012). Indeed, several niche-based  
282 processes predict dispersal limitation, especially when associated with spatially heterogeneous  
283 environments, demographic stochasticity, or strong, asymmetric competition (Chesson, 2000;  
284 Chase et al., 2005).

285         The broad-scale spatial pattern of pond morphology variables and canopy cover seems to  
286 influence tadpole metacommunity dynamics. These variables are also known to influence  
287 breeding site selection by adults (Resetarits et al., 2005; Binckley & Resetarits, 2007; Skelly et  
288 al., 1999; Werner & Glennemeier, 1999). An experimental study (Binckley & Resetarits, 2007)  
289 showed that treefrogs actively selected open-canopy ponds and deposited significantly more eggs  
290 in these ponds than in closed-canopy ponds. Additionally, treefrogs and aquatic beetles  
291 discriminated between fish and fishless ponds for oviposition sites. In our study area, canopy  
292 cover was lower in the northernmost ponds (Table 2). As a result, species inhabiting open-  
293 canopy ponds are more abundant in that region (except *D. minutus* and *B. ahenea*, which occur  
294 more widely, but are less abundant elsewhere). These results support the idea that stabilizing  
295 niche differences (Chesson, 2000) related to different environmental requirements for adult  
296 reproduction as key mechanisms structuring this metacommunity.

297         Contrary to our initial prediction about within-pond community structure, water  
298 chemistry variables do not seem to influence tadpole species composition. This result is in

299 agreement with previous studies on amphibians (Hecnar & M'Closkey, 1996; Brodman et al.,  
300 2003). Other abiotic (e.g., pond canopy cover, productivity, hydroperiod) and biotic variables  
301 (e.g., presence of fish) may be more important than water chemistry in determining pond  
302 colonization by adults and survival of tadpoles. Additionally, water chemistry variables seemed  
303 not to vary in a wide range at the landscape-scale in our study area. Phenotypic plasticity  
304 mediates species coexistence in ecological communities and also their response to environmental  
305 variation (Miner et al., 2005). The high adaptive plasticity of tadpoles in response not only to  
306 predators (Relyea and Werner, 2000), but also to local environmental variables, food availability,  
307 and pond drying (Newman, 1992) is a possible mechanism responsible for the lack of influence  
308 of water chemistry on species composition.

309         The spatial autocorrelation in species composition at short distances seems to be driven  
310 by the induced spatial dependence of pond morphology variables, such as aquatic vegetation,  
311 depth, area, and canopy cover. However, it is difficult to tease apart if species composition is  
312 spatially autocorrelated due to dispersal limitation or due to species response to spatially  
313 structured environmental variables, or even a combination of both (Shurin et al., 2009). Dispersal  
314 ability varies among species in a metacommunity and populations of some species may be more  
315 isolated than others. Dispersal in adults is usually restricted to the surroundings of one breeding  
316 site or a cluster of ponds nearby (Semlitsch, 2008). As a consequence, it is still difficult to assign  
317 a single mechanism (e.g., dispersal limitation, philopatry) to the pure spatial component. Despite  
318 that limitation, previous studies using microsatellite markers as an indirect way to estimate  
319 dispersal in anurans (Newman & Squire, 2001 and references therein) did not find population  
320 differentiation at the scale of 2 km. These data agree with our results about spatial  
321 autocorrelation in species composition, since we also did not find a differentiation in species

322 composition of ponds separated by 2.43 Km. Thus, despite the lack of data for dispersal ability,  
323 these results could suggest that both dispersal limitation and responses to spatially structured  
324 environmental variables can be involved in the dynamics of this larval metacommunity.

325 In summary, we have shown that the induced spatial dependence of pond morphology  
326 and canopy cover strongly influenced the tadpole metacommunity structure. These findings posit  
327 strong role for adult behavior in determining larval ecology. It might be possible to extrapolate  
328 our results to explain the distribution of other organisms with similar complex life cycles that  
329 represent an important link between aquatic and terrestrial ecosystems and play a key role in  
330 biomass export (Earl et al., 2011). The effect of the surrounding terrestrial landscape in  
331 determining species assembly in the adjacent, aquatic ecosystem deserves further investigation in  
332 other freshwater organisms. For example, understanding how the spatial dynamics of terrestrial  
333 landscape and species composition modulate aquatic communities may contribute to studies  
334 modeling the flux of species and subsidies, trophic interactions, and metaecosystem dynamics  
335 (Massol et al., 2011). Future studies should also integrate the effects of broad- and fine-spatial  
336 scales on amphibian species with different dispersal abilities. In addition, metacommunity  
337 simulations in an environmentally homogeneous domain could evaluate how philopatric  
338 behavior and neutral dynamics create spatial patterns.

339

#### 340 **Acknowledgments**

341 We are indebted to M. Almeida Neto, F. Altermatt, L. M. Bini, J. W. Fox, V. L. Landeiro, G. F.  
342 Livingston, T. F. Rangel, and T. Siqueira for providing very useful insights to this manuscript. A.  
343 Bispo and B. Vilela helped with the map. IBAMA provided collecting permits (#14474) and the  
344 staff of the Serra da Bocaina National Park kindly provided logistical support and housing. This

345 paper is part of DBP master's thesis at the Biologia Animal graduate program, supported by  
346 FAPESP-São Paulo Research Foundation (#2008/55744-6) and CAPES-Coordenação de  
347 Aperfeiçoamento de Pessoal de nível Superior fellowships. We greatly acknowledge the input  
348 received from L. C. Schiesari and L. Casatti as members of DBP's thesis examining committee.  
349 MVG and TG-S were supported by FAPESP doctoral fellowships (#2008/50575-1, 2008/58979-  
350 4). IAM was supported by a Jovem Pesquisador grant from FAPESP (01/13341-3 and 06/56007-  
351 0). During the final preparation of the manuscript DBP was supported by a CAPES-DS and  
352 CAPES-PDSE doctoral fellowships. We also thank all those who helped in the field and lab  
353 work. DCRF is a fellow of the Brazilian National Council for Scientific and Technological  
354 Development. Voucher specimens are housed at the tadpole collection of DZSJRP-UNESP.

355

## 356 **References**

- 357 Altermatt, F., S. Schreiber & M. Holyoak, 2011. Interactive effects of disturbance and dispersal  
358 directionality on species richness and composition in metacommunities. *Ecology* 92: 859-870.
- 359 Beisner, B. E., P. R. Peres-Neto, E. S. Lindstrom, A. Barnett & M. L. Longhi, 2006. The role of  
360 environmental and spatial processes in structuring lake communities from bacteria to fish. *Ecology*  
361 87:2985-2991.
- 362 Binckley, C. A. & W. J. Resetarits, 2007. Effects of forest canopy on habitat selection in treefrogs and  
363 aquatic insects: implications for communities and metacommunities. *Oecologia* 153:951-958.
- 364 Bivand, R., 2012. spdep: Spatial dependence: weighting schemes, statistics and models. R package  
365 version 0.5-53. <http://CRAN.R-project.org/package=spdep>
- 366 Borcard, D., P. Legendre, C. Avois-Jacquet & H. Tuomisto, 2004. Dissecting the spatial structure of  
367 ecological data at multiple scales. *Ecology* 85:1826-1832.



- 368 Brodman, R., J. Ogger, T. Bogard, A. J. Long, R. A. Pulver, K. Mancuso & D. Falk, 2003. Multivariate  
369 Analyses of the Influences of Water Chemistry and Habitat Parameters on the Abundances of Pond-  
370 Breeding Amphibians. *Journal of Freshwater Ecology* 18:425-436.
- 371 Cadotte, M. W., 2006. Metacommunity influences on community richness at multiple spatial scales: a  
372 microcosm experiment. *Ecology* 87:1008-1016.
- 373 Chase, J. M., P. Amarasekare, K. Cottenie, A. Gonzalez, R. D. Holt, M. Holyoak, M. F. Hoopes, M. A.  
374 Leibold, M. Loreau, N. Mouquet, J. B. Shurin & D. Tilman, 2005. Competing theories for  
375 competitive metacommunities. In Holyoak, M., M. A. Leibold & R. D. Holt (eds) *Metacommunities:*  
376 *spatial dynamics and ecological communities*. Chicago university press, Chicago, 335-354.
- 377 Chesson, P., 2000. Mechanisms of maintenance of species diversity. *Annual Review of Ecology and*  
378 *Systematics* 31:343-366.
- 379 Cottenie, K., 2005. Integrating environmental and spatial processes in ecological community dynamics.  
380 *Ecology Letters* 8:1175-1182.
- 381 Diniz-Filho, J. A. F., T. Siqueira, A. A. Padial, T. F. Rangel, V. L. Landeiro & L. M. Bini, 2012. Spatial  
382 autocorrelation analysis allows disentangling the balance between neutral and niche processes in  
383 metacommunities. *Oikos* 121:201-210.
- 384 Dray, S, 2009. packfor: Forward Selection with permutation (Canoco p. 46). R package version 0.0-  
385 7/r58. <http://R-Forge.R-project.org/projects/sedar/>
- 386 Dray, S., R. Péliissier, P. Couteron, M. J. Fortin, P. Legendre, P. R. Peres-Neto, E. Bellier, R. Bivand, F.  
387 G. Blanchet, M. De Cáceres, A. B. Dufour, E. Heegaard, T. Jombart, F. Munoz, J. Oksanen, J.  
388 Thioulouse & H. H. Wagner, 2012. Community ecology in the age of multivariate multiscale spatial  
389 analysis. *Ecological Monographs* 82:257-275.
- 390 Earl, J. E., T. M. Luhring, B. K. Williams & R. D. Semlitsch, 2011. Biomass export of salamanders and

- 391 anurans from ponds is affected differentially by changes in canopy cover. *Freshwater Biology*  
392 56:2473-2482.
- 393 Furrer, R., D. Nychka & S. Sain, 2011. fields: Tools for spatial data. R package version 6.6.  
394 <http://CRAN.R-project.org/package=fields>
- 395 Gilbert, B. & J. R. Bennett, 2010. Partitioning variation in ecological communities: do the numbers add  
396 up? *Journal of Applied Ecology* 47:1071-1082.
- 397 Hájek, M., J. Roleček, K. Cottenie, K. Kintrová, M. Horskák, A. Poulíčková, P. Hájková, M. Fránková &  
398 D. Dítě, 2011. Environmental and spatial controls of biotic assemblages in a discrete semi-terrestrial  
399 habitat: comparison of organisms with different dispersal abilities sampled in the same plots. *Journal*  
400 *of Biogeography* 38:1683-1693.
- 401 Hecnar, S. & R. M'Closkey, 1996. Amphibian species richness and distribution in relation to pond water  
402 chemistry in south-western Ontario, Canada. *Freshwater Biology* 36:7-15.
- 403 Hoverman, J. T., C. J. Davis, E. E. Werner, D. K. Skelly, R. A. Relyea & K. L. Yurewicz, 2011.  
404 Environmental gradients and the structure of freshwater snail communities. *Ecography* 34:1049-  
405 1058.
- 406 Landeiro, V. L., W. E. Magnusson, A. S. Melo, H. M. V. Espírito-Santo & L. M. Bini, 2011. Spatial  
407 eigenfunction analyses in stream networks: do watercourse and overland distances produce different  
408 results? *Freshwater Biology* 56:1184-1192.
- 409 Legendre, P. & L. Legendre, 2012. *Numerical Ecology*, 3rd. edn. Elsevier Limited, Oxford.
- 410 Legendre, P., D. Borcard, G. Blanchet & S. Dray, 2010. PCNM: PCNM spatial eigenfunction  
411 and principal coordinate analyses. R package version 2.1/r82. [http://R-Forge.R-](http://R-Forge.R-project.org/projects/sedar/)  
412 [project.org/projects/sedar/](http://R-Forge.R-project.org/projects/sedar/)
- 413 Leibold, M. A. & M. A. Mcpeck, 2006. Coexistence of the niche and neutral perspectives in community

- 414 ecology. *Ecology* 87:1399–1410.
- 415 Leibold, M. A., M. Holyoak, N. Mouquet, P. Amarasekare, J. M. Chase, M. F. Hoopes, R. D. Holt, J. B.
- 416 Shurin, R. Law, D. Tilman, M. Loreau & A. Gonzalez, 2004. The metacommunity concept: a
- 417 framework for multi-scale community ecology. *Ecology Letters* 7:601–613.
- 418 Lepš, J. & P. Šmilauer, 2003. *Multivariate analysis of ecological data using CANOCO*. Cambridge
- 419 University Press, Cambridge.
- 420 Levin, S. A., 1992. The problem of pattern and scale in ecology. *Ecology* 73:1943-1967.
- 421 Logue, J. B., N. Mouquet, H. Peter & H. Hillebrand, 2011. Empirical approaches to metacommunities: a
- 422 review and comparison with theory. *Trends in Ecology & Evolution* 26:482-491.
- 423 Massol, F., D. Gravel, N. Mouquet, M. W. Cadotte, T. Fukami & M. A. Leibold, 2011. Linking
- 424 community and ecosystem dynamics through spatial ecology. *Ecology Letters* 14:313-323.
- 425 McCauley, S. J., C. J. Davis, R. A. Relyea, K. L. Yurewicz, D. K. Skelly & E. E. Werner, 2008.
- 426 Metacommunity patterns in larval odonates. *Oecologia* 158:329–342.
- 427 McIntire, E. J. B. & A. Fajardo, 2009. Beyond description: the active and effective way to infer
- 428 processes from spatial patterns. *Ecology* 90:46-56.
- 429 Miner, B. G., S. E. Sultan, S. G. Morgan, D. K. Padilla & R. A. Relyea, 2005. Ecological consequences
- 430 of phenotypic plasticity. *Trends in Ecology and Evolution* 20:685-692.
- 431 Newman, R.A., 1992. Adaptive plasticity in amphibian metamorphosis. *BioScience* 42: 671-678.
- 432 Newman, R. A. & T. Squire, 2001. Microsatellite variation and fine-scale population structure in
- 433 the wood frog (*Rana sylvatica*). *Molecular Ecology* 10:1087–1100.
- 434 Oksanen, J., F. G. Blanchet, R. Kindt, P. Legendre, R. B. O'Hara, G. L. Simpson, P. Solymos, M.
- 435 H. H. Stevens & H. Wagner, 2011. *vegan: Community ecology package*. R package version
- 436 1.17-12. <http://CRAN.R-project.org/package=vegan>

- 437 Peel, M. C., B. L. Finlayson & T. A. McMahon, 2007. Updated world map of the Köppen-Geiger  
438 climate classification. *Hydrology and Earth System Sciences* 11:1633–1644.
- 439 R Core Team, 2011. R: a language and environment for statistical computing. R Foundation for  
440 Statistical Computing, Vienna, Austria. Available at: <http://www.R-project.org>
- 441 Relyea, R. A. & E. E. Werner, 2000. Morphological plasticity in four larval anurans distributed along an  
442 environmental gradient. *Copeia* 2000:178–190.
- 443 Resetarits, W., C. A. Binckley & D. R. Chalcraft, 2005. Habitat selection, species interactions, and  
444 processes of community assembly in complex landscapes. In Holyoak, M., M. A. Leibold & R. D.  
445 Holt (eds) *Metacommunities: spatial dynamics and ecological communities* University of Chicago  
446 Press, Chicago. Chicago University press, USA, Chicago, 374-398.
- 447 Scheffer, M., S. H. Hosper, M. L. Meijer, B. Moss & E. Jeppesen, 1993. Alternative equilibria in  
448 shallow lakes. *Trends in Ecology and Evolution* 8:275-279.
- 449 Schiesari, L., 2006. Pond canopy cover: a resource gradient for anuran larvae. *Freshwater Biology*  
450 51:412–423.
- 451 Semlitsch, R. D., 2008. Differentiating Migration and Dispersal Processes for Pond-Breeding  
452 Amphibians. *The Journal of Wildlife Management* 72:260-267.
- 453 Shurin, J. B., K. Cottenie & H. Hillebrand, 2009. Spatial autocorrelation and dispersal limitation in  
454 freshwater organisms. *Oecologia* 159:151–159.
- 455 Skelly, D. K., E. E. Werner & S. A. Cortwright, 1999. Long-Term Distributional Dynamics of a  
456 Michigan Amphibian Assemblage. *Ecology* 80:2326-2337.
- 457 Skelly, D. K. & J. L. Richardson, 2010. Larval sampling. In Dodd, C. K. (ed) *Amphibian Ecology and*  
458 *conservation, a handbook of techniques*. Oxford University Press, Oxford, 55-70.
- 459 Smith, M. A. & D. M. Green, 2005. Dispersal and the metapopulation paradigm in amphibian ecology

- 460 and conservation: are all amphibian populations metapopulations? *Ecography* 28:110-128.
- 461 Smith, T. W. & J. T. Lundholm, 2010. Variation partitioning as a tool to distinguish between niche and  
462 neutral processes. *Ecography* 33:648-655.
- 463 Ultsch, G. R., D. F. Bradford & J. Freda, 1999. *Physiology: coping with the environment*. In  
464 McDiarmid, R. W. & R. Altig (eds) *Tadpoles: the biology of anuran larvae*. Chicago University  
465 Press, Chicago, 189-214.
- 466 Vellend, M., 2010. Conceptual synthesis in community ecology. *Quarterly Review of Biology* 85:183-  
467 206.
- 468 Welch, N. E. & J. A. MacMahon, 2005. Identifying habitat variables important to the rare columbia  
469 spotted frog in Utah (U.S.A.): an information-theoretic approach. *Conservation Biology* 19:473-481.
- 470 Wells, K. D., 2007. *The ecology and behavior of amphibians*. University of Chicago Press, Chicago.
- 471 Werner, E. E. & K. S. Glennemeier, 1999. Influence of forest canopy cover on the breeding pond  
472 distributions of several amphibian species. *Copeia* 1999:1-12.
- 473 Werner, E. E., D. K. Skelly, R. A. Relyea & K. L. Yurewicz, 2007. Amphibian species richness across  
474 environmental gradients. *Oikos* 116:1697-1712.

475

476 Figure legends

477

478 Fig. 1. Map showing the location of the study area and the spatial distribution of sampled ponds  
479 in the Serra da Bocaina National Park, southeastern Brazil. Gray areas represent primary or  
480 secondary forest; white areas represent open areas.

481

482 Fig. 2. Result of variation partition with partial Redundancy Analysis showing the pure and  
483 shared influences of spatial variables, water chemistry, and pond morphology on tadpole species  
484 composition. Numbers represent adjusted canonical  $R^2$  values.

485

486 Fig. 3. Biplot of the Redundancy analysis showing the major influence of A) pond canopy cover  
487 and B) aquatic vegetation on Hellinger-transformed data of tadpole species abundance. Isolines  
488 represent the fitted smooth surface for each environmental variable, obtained with function  
489 *ordisurf* in R package *vegan*. Only species with high scores are shown. Aplper=*Aplastodiscus*  
490 *perviridis*, Bokahe=*Bokermannohyla ahenea*, Denmic= *Dendropsophus microps*,  
491 Hyppol=*Hypsiboas* sp. (aff. *polytaenius*), Phybar=*Physalaemus barrioi*, Rhiict=*Rhinella*  
492 *icterica*, Scidua=*Scinax* sp. (aff. *duartei*).

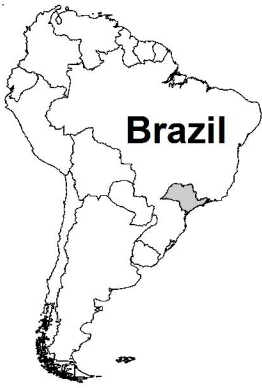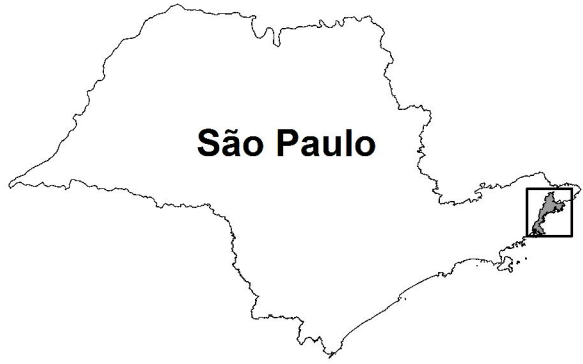

**Serra da Bocaina  
National Park**

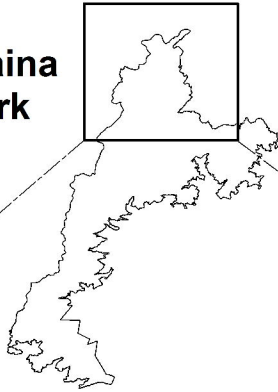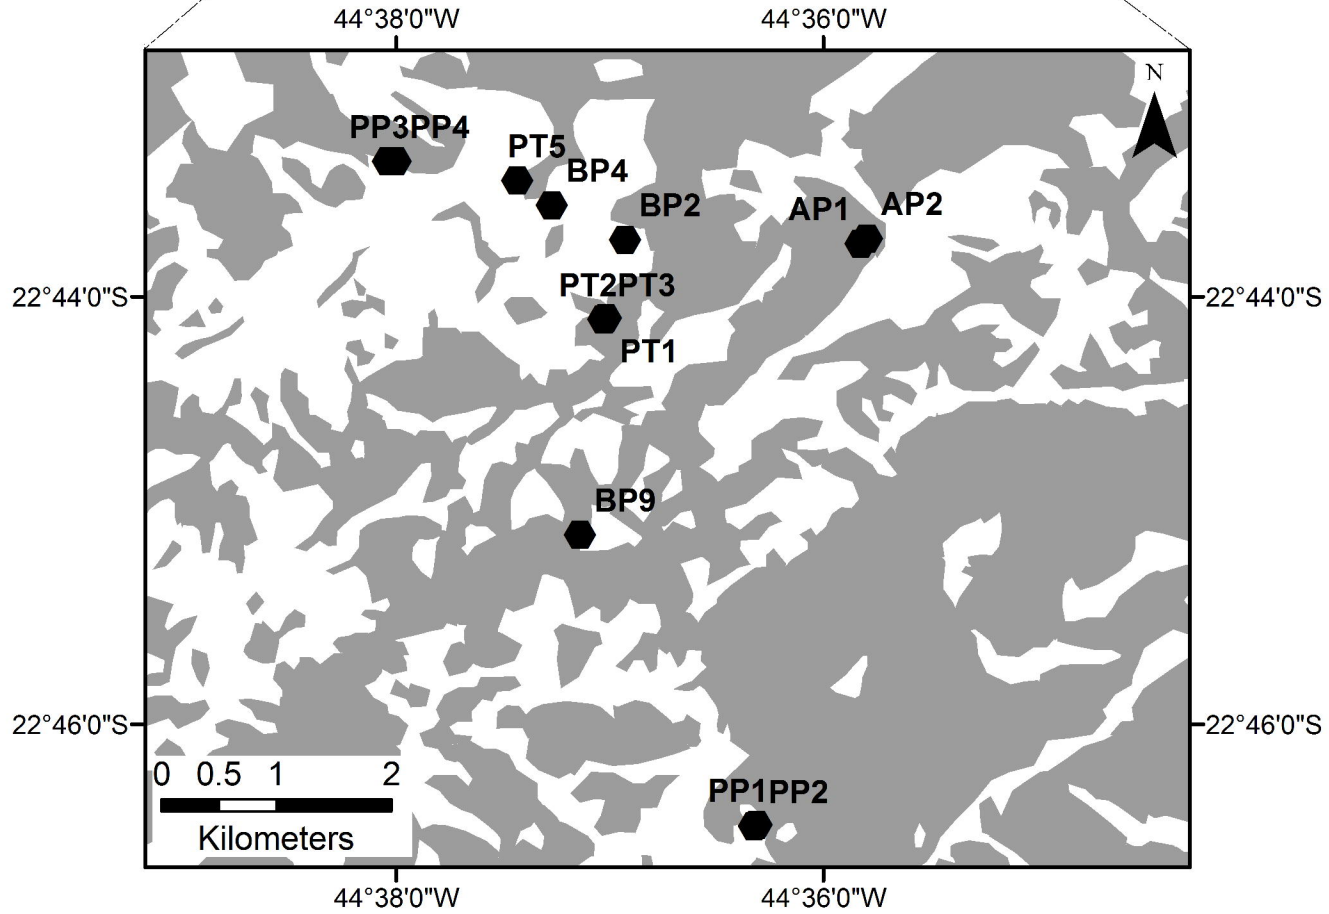

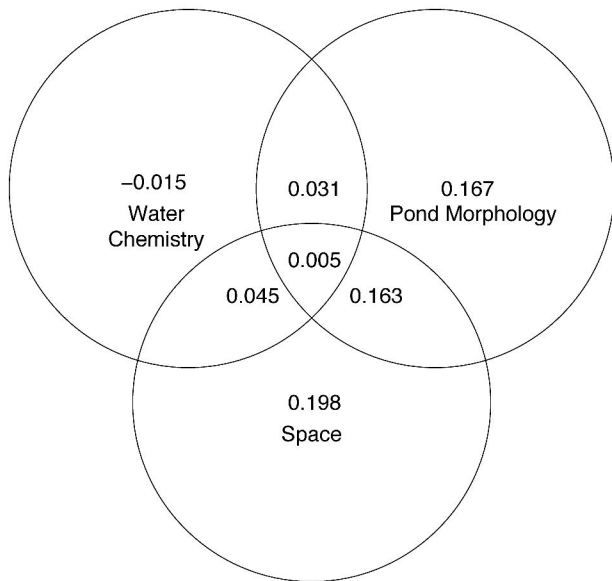



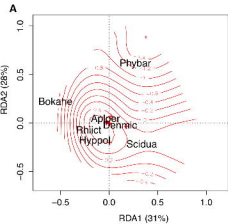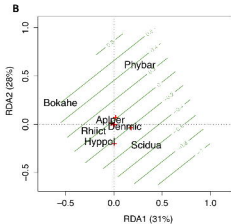

Source: https://www.biorxiv.org/content/biorxiv/early/2013/12/05/001255.full.pdf
